# Supplementary material for: Aspochalasin H1: A New Cyclic Aspochalasin from Hawaiian Plant-Associated Endophytic Fungus Aspergillus sp. FT1307
Source: MDPI journal article supplement (doi:10.3390/molecules26144239), 2021-07-12
Supplement: s1 [file s1]

# Supplementary Data

## Aspochalasin H1: A New Cyclic Aspochalasin from Hawaiian Plant-associated Endophytic Fungus *Aspergillus* sp. FT1307

Mallique Qader <sup>1,†</sup>, KH Ahammad Uz Zaman <sup>1,†</sup>, Zhenquan Hu <sup>2,3</sup>, Cong Wang <sup>1,4</sup>, Xiaohua Wu <sup>1</sup> and Shugeng Cao <sup>1,\*</sup>

<sup>1</sup> Department of Pharmaceutical Sciences, Daniel K. Inouye College of Pharmacy, University of Hawai'i at Hilo, Hilo, Hawai'i 96720, USA; [mqader@hawaii.edu](mailto:mqader@hawaii.edu) (M.Q.); [kzaman@hawaii.edu](mailto:kzaman@hawaii.edu) (K.A.U.Z.); [congwang@hawaii.edu](mailto:congwang@hawaii.edu) (C.W.); [xiaohua3@hawaii.edu](mailto:xiaohua3@hawaii.edu) (X.W.)

<sup>2</sup> Warshel Institute for Computational Biology, The Chinese University of Hong Kong, Shenzhen 518172, China; [huzhenquan@cuhk.edu.cn](mailto:huzhenquan@cuhk.edu.cn) (Z.H.)

<sup>3</sup> School of Chemistry and Materials Science, University of Science and Technology of China, Hefei 230026, China

<sup>4</sup> Guangxi Key Laboratory of Chemistry and Chemical Engineering of Forest Products, School of Chemistry for Nationalities, Nanning 530006, China.

† These authors contributed equally to this work.

\* Correspondence: [scao@hawaii.edu](mailto:scao@hawaii.edu); Tel.: 1-808-981-8017

### Figures

|             |                                                                                               |   |
|-------------|-----------------------------------------------------------------------------------------------|---|
| Figure S1:  | HR-ESI-MS spectrum of <b>1</b>                                                                | 2 |
| Figure S2:  | <sup>1</sup> H NMR spectrum of <b>1</b> (400 MHz, DMSO- <i>d</i> <sub>6</sub> , 298 K)        | 2 |
| Figure S3:  | <sup>1</sup> H NMR spectrum of <b>1</b> (400 MHz, CDCl <sub>3</sub> , 298 K)                  | 3 |
| Figure S4:  | <sup>1</sup> H- <sup>1</sup> H COSY spectrum of <b>1</b> (400 MHz, CDCl <sub>3</sub> , 298 K) | 3 |
| Figure S5:  | HSQC spectrum of <b>1</b> (400 MHz, CDCl <sub>3</sub> , 298 K)                                | 4 |
| Figure S6:  | ROESY spectrum of <b>1</b> (400 MHz, CDCl <sub>3</sub> , 298 K)                               | 4 |
| Figure S7:  | HMBC spectrum of <b>1</b> (400 MHz, CDCl <sub>3</sub> , 298 K)                                | 5 |
| Figure S8:  | IR spectra of <b>1</b>                                                                        | 5 |
| Figure S9:  | Experimental and calculated ECD spectra of <b>1</b>                                           | 6 |
| Figure S10: | Conformation analysis of <b>1</b> (17R,18S,19S,20R and 17R,18S,19R,20R)                       | 7 |

### Tables

|           |                              |   |
|-----------|------------------------------|---|
| Table S1: | NMR calculations of <b>1</b> | 8 |
|-----------|------------------------------|---|

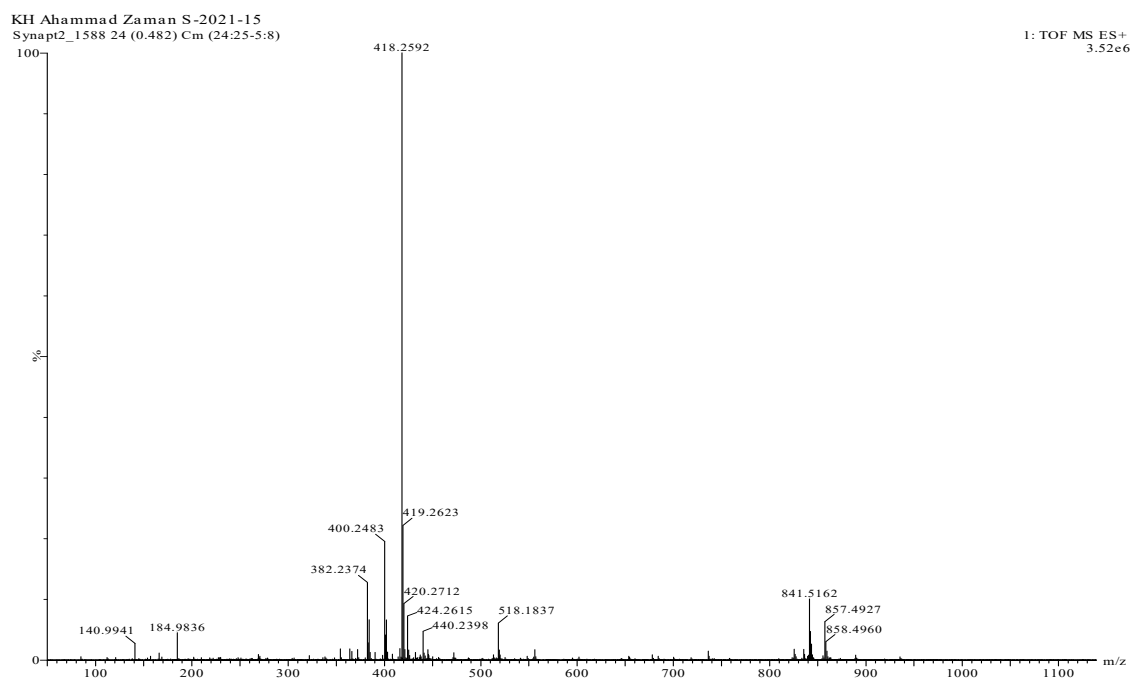

Figure S1: HR-ESI-MS spectrum of 1

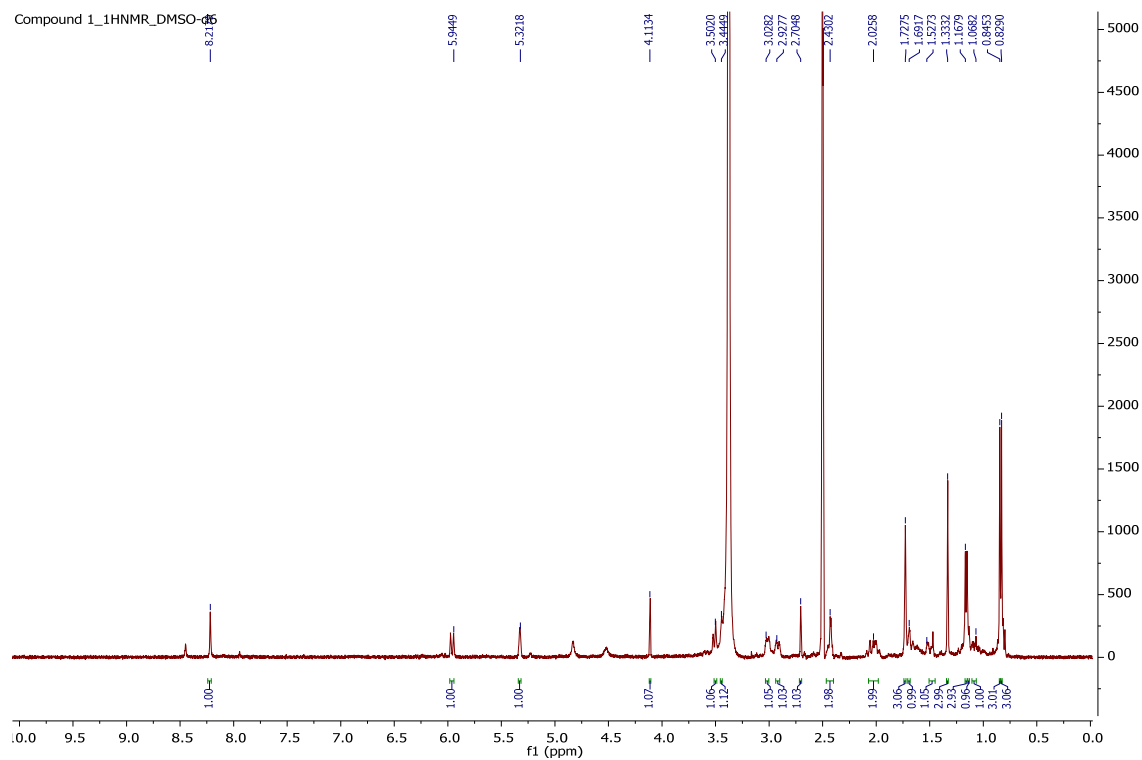

Figure S2: <sup>1</sup>H NMR spectrum of 1 (400 MHz, DMSO-*d*<sub>6</sub>, 298 K)



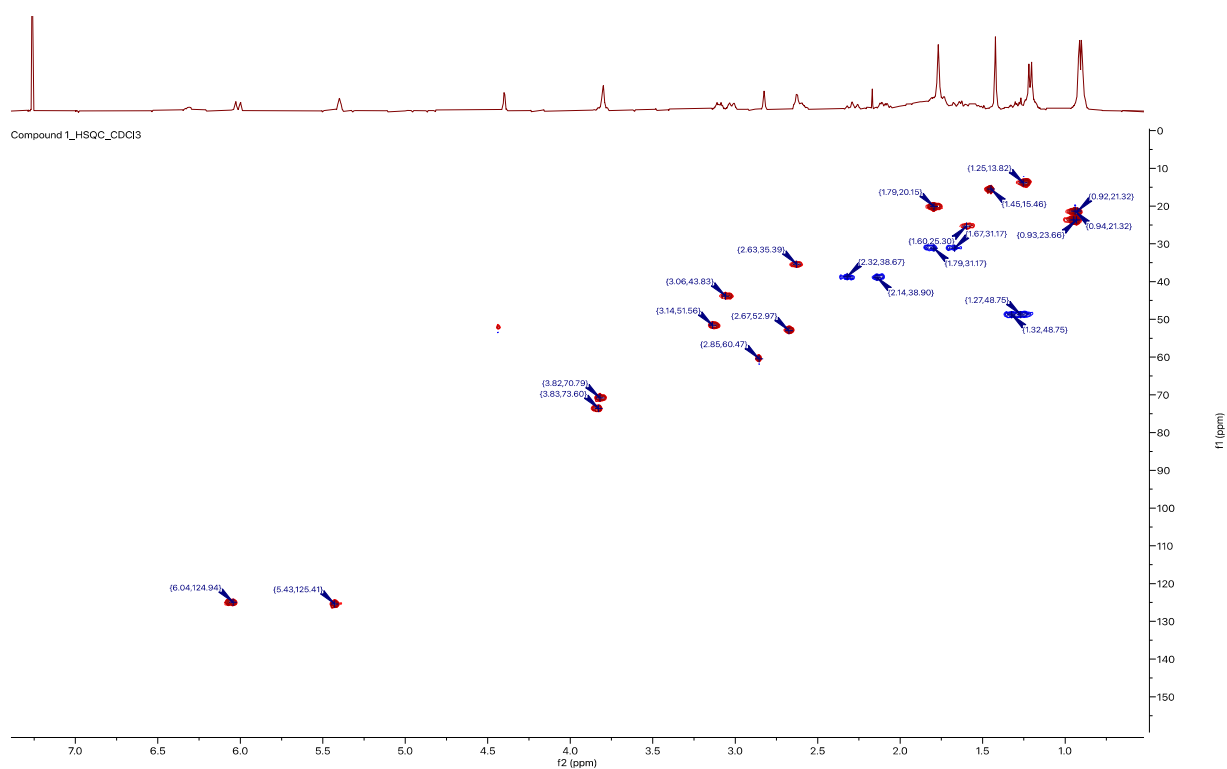

Figure S5: HSQC spectrum of **1** (400 MHz, CDCl<sub>3</sub>, 298 K)

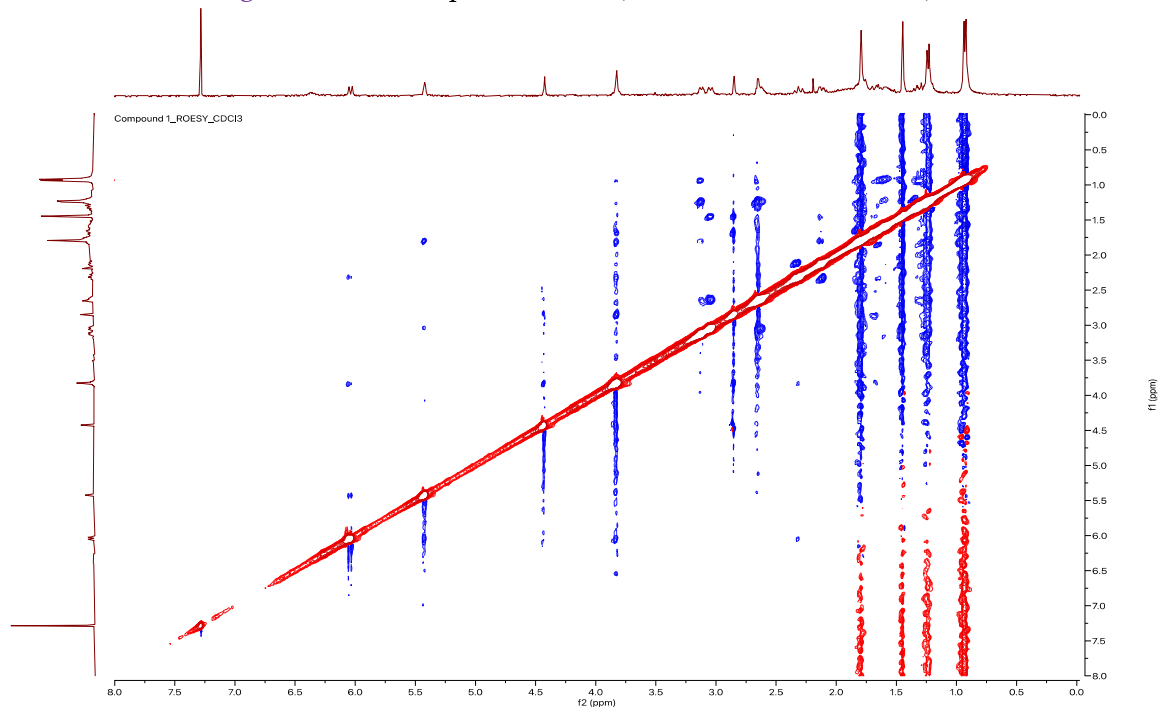

Figure S6: ROESY spectrum of **1** (400 MHz, CDCl<sub>3</sub>, 298 K)



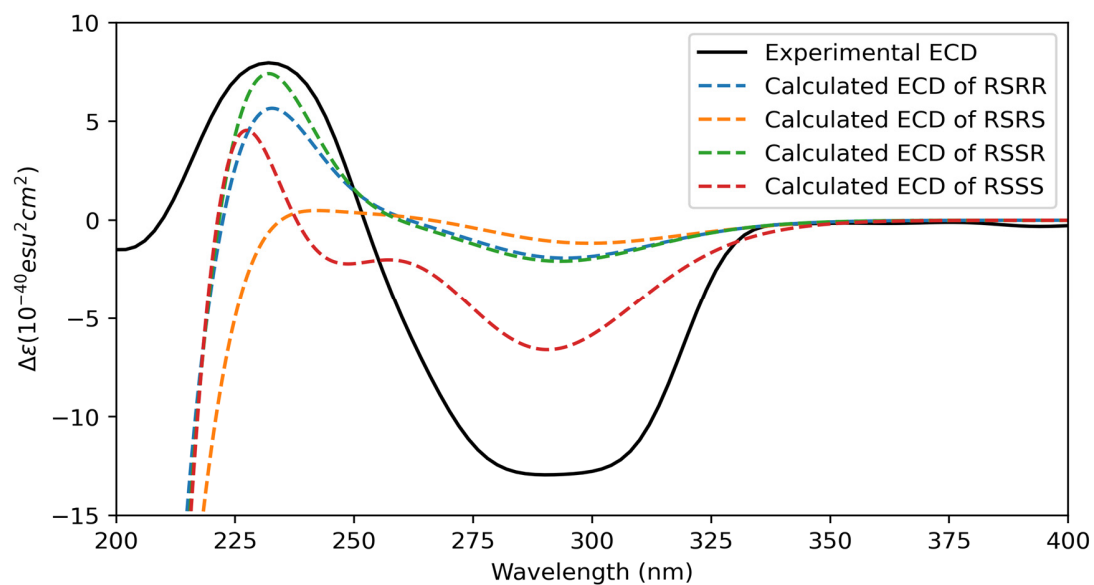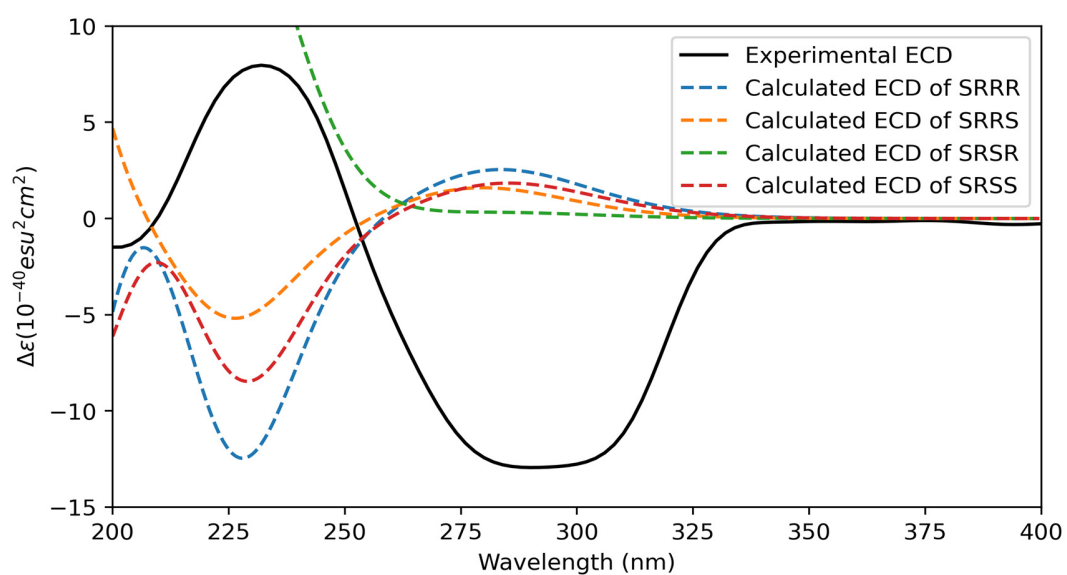

Figure S9: ECD spectra of **1**

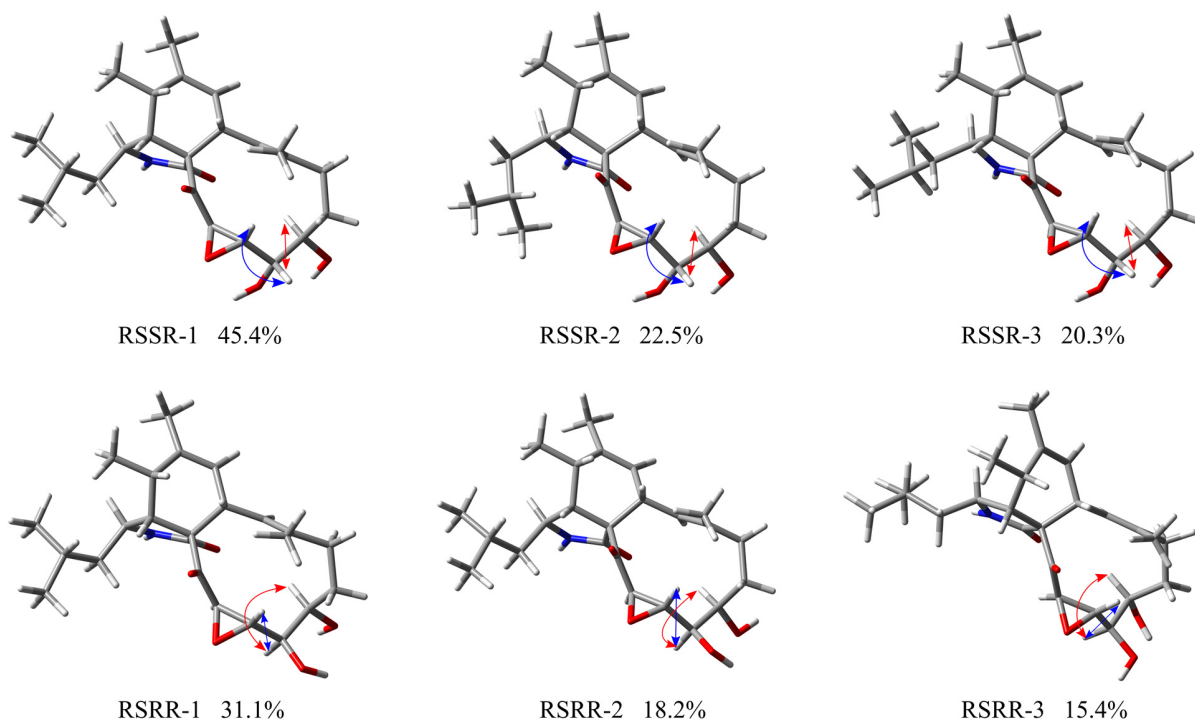

Figure S10: Conformation analysis of **1** (17R,18S,19S,20R and 17R,18S,19R,20R)

Table S1: NMR calculations of 1

| C/H No | Experimental data |            | RSRR       |            | RSRS       |            | RSSR       |            | RSSS       |            | SRRR       |            | SRRS       |            | SRSR       |            | SRSS       |            |
|--------|-------------------|------------|------------|------------|------------|------------|------------|------------|------------|------------|------------|------------|------------|------------|------------|------------|------------|------------|
|        | $\delta C$        | $\delta H$ | $\delta C$ | $\delta H$ | $\delta C$ | $\delta H$ | $\delta C$ | $\delta H$ | $\delta C$ | $\delta H$ | $\delta C$ | $\delta H$ | $\delta C$ | $\delta H$ | $\delta C$ | $\delta H$ | $\delta C$ | $\delta H$ |
| 1      | 174.6             |            | 173.5      |            | 173.4      |            | 173.7      |            | 173.1      |            | 172.6      |            | 172.2      |            | 173.5      |            | 174.1      |            |
| 3      | 51.6              | 3.10       | 54.9       | 3.19       | 53.9       | 5.47       | 52.6       | 3.15       | 54.1       | 5.47       | 54.2       | 5.42       | 52.9       | 5.34       | 52.8       | 5.45       | 52.8       | 5.50       |
| 4      | 52.9              | 2.64       | 56.2       | 2.96       | 55.7       | 2.97       | 57.2       | 2.71       | 53.8       | 2.99       | 59.4       | 3.45       | 54.9       | 3.41       | 59.3       | 3.60       | 59.4       | 3.68       |
| 5      | 35.4              | 2.60       | 38.6       | 2.52       | 39.4       | 4.67       | 39.3       | 2.55       | 39.2       | 4.88       | 38.4       | 3.67       | 39.0       | 4.07       | 39.6       | 3.46       | 40.0       | 3.49       |
| 6      | 140.6             |            | 146.5      |            | 146.8      |            | 146.4      |            | 146.7      |            | 145.4      |            | 147.4      |            | 146.1      |            | 145.8      |            |
| 7      | 125.6             | 5.39       | 126.2      | 5.44       | 127.3      | 2.95       | 126.7      | 5.44       | 127.0      | 2.99       | 129.1      | 2.97       | 126.5      | 3.23       | 127.9      | 2.39       | 128.0      | 2.30       |
| 8      | 43.8              | 3.02       | 49.0       | 3.13       | 48.4       | 2.48       | 49.0       | 3.12       | 48.5       | 2.45       | 39.8       | 2.45       | 42.0       | 2.42       | 40.6       | 2.58       | 41.5       | 2.60       |
| 9      | 68.4              |            | 73.0       |            | 72.4       |            | 72.7       |            | 73.6       |            | 71.7       |            | 73.3       |            | 71.5       |            | 71.2       |            |
| 10     | 48.8              | 1.29       | 47.5       | 1.26       | 49.3       | 1.35       | 49.2       | 1.20       | 46.5       | 1.30       | 47.3       | 1.59       | 46.4       | 1.62       | 46.6       | 1.63       | 47.6       | 1.51       |
| 11     | 13.7              | 1.21       | 11.9       | 1.29       | 13.3       | 1.25       | 12.3       | 1.28       | 12.6       | 1.26       | 13.7       | 1.18       | 14.5       | 1.28       | 13.9       | 1.23       | 13.4       | 1.22       |
| 12     | 20.1              | 1.76       | 19.2       | 1.80       | 20.0       | 2.24       | 19.4       | 1.83       | 19.6       | 2.27       | 19.7       | 2.17       | 19.9       | 2.27       | 20.0       | 2.26       | 19.9       | 2.31       |
| 13     | 125.2             | 6.04       | 127.1      | 6.27       | 127.1      | 2.07       | 127.9      | 6.25       | 126.5      | 1.96       | 127.8      | 2.27       | 132.2      | 2.10       | 129.0      | 2.30       | 128.8      | 1.65       |
| 14     | 135.6             |            | 141.1      |            | 143.3      |            | 140.4      |            | 144.0      |            | 141.5      |            | 142.2      |            | 139.7      |            | 142.1      |            |
| 15     | 38.8              | 2.10,2.29  | 40.4       | 2.17,2.34  | 36.8       | 1.97,2.49  | 40.1       | 2.13,2.36  | 37.3       | 1.63,2.54  | 42.1       | 2.28,2.81  | 35.6       | 1.91,2.45  | 40.4       | 2.06,2.42  | 31.6       | 2.19,2.65  |
| 16     | 31.0              | 1.63,1.76  | 32.7       | 1.53,2.29  | 36.2       | 1.83,3.67  | 33.4       | 1.70,1.79  | 38.5       | 2.50,3.61  | 31.9       | 1.47,3.94  | 39.5       | 1.82,3.03  | 38.6       | 1.72,3.51  | 37.5       | 1.939,3.96 |
| 17     | 73.7              | 3.80       | 74.6       | 3.74       | 72.1       | 3.23       | 76.7       | 3.74       | 75.4       | 4.31       | 74.2       | 4.12       | 67.8       | 3.78       | 72.1       | 2.74       | 78.6       | 2.92       |
| 18     | 70.8              | 3.78       | 80.8       | 3.37       | 78.3       | 1.86       | 74.1       | 3.71       | 75.5       | 1.80       | 76.9       | 1.73       | 72.4       | 1.86       | 79.0       | 1.99       | 75.0       | 1.83       |
| 19     | 60.5              | 2.82       | 64.6       | 2.47       | 65.2       | 6.48       | 63.6       | 2.67       | 64.1       | 6.48       | 63.3       | 6.32       | 62.8       | 6.84       | 65.2       | 6.87       | 62.3       | 7.25       |
| 20     | 52.2              | 4.40       | 56.2       | 4.17       | 57.5       | 2.74       | 54.6       | 4.31       | 51.8       | 2.99       | 58.8       | 3.08       | 57.8       | 3.12       | 59.5       | 2.81       | 61.7       | 3.18       |
| 21     | 208.0             |            | 210.6      |            | 208.9      |            | 211.4      |            | 210.1      |            | 211.7      |            | 209.1      |            | 212.7      |            | 212.6      |            |
| 22     | 25.2              | 1.56       | 30.4       | 1.64       | 31.5       | 1.69       | 29.8       | 1.62       | 28.6       | 1.55       | 31.8       | 1.74       | 31.1       | 1.71       | 27.5       | 1.53       | 29.1       | 1.60       |
| 23     | 23.7              | 0.91       | 21.9       | 1.00       | 21.7       | 0.96       | 22.0       | 0.89       | 20.5       | 0.92       | 21.4       | 1.00       | 19.1       | 1.03       | 23.2       | 0.95       | 19.0       | 0.95       |
| 24     | 21.4              | 0.90       | 23.9       | 0.96       | 21.0       | 0.97       | 20.9       | 0.97       | 23.8       | 0.92       | 21.3       | 1.01       | 22.3       | 1.06       | 20.3       | 0.96       | 23.1       | 0.98       |
| 25     | 15.5              | 1.42       | 14.3       | 1.49       | 17.0       | 1.60       | 14.3       | 1.47       | 19.2       | 1.64       | 14.4       | 1.79       | 17.6       | 1.82       | 14.6       | 1.79       | 18.2       | 1.81       |

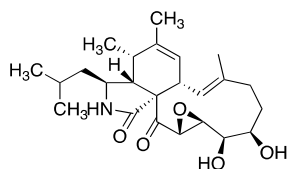

RSRR

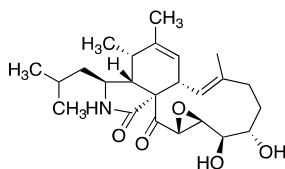

RSRS

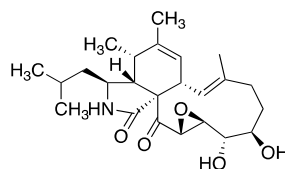

RSSR

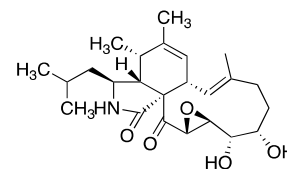

RSSS

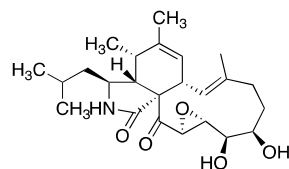

SRRR

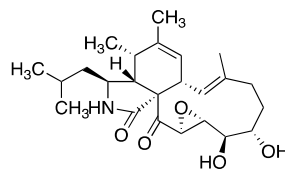

SRRS

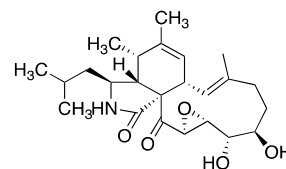

SRSR

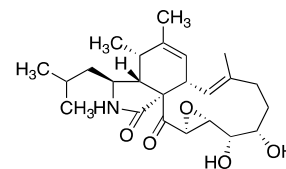

SRSS
